# Supplementary material for: Modeling Mycobacterium tuberculosis early granuloma formation in experimental human lung tissue
Source: PubMed Central journal article supplement (PMC3917249; doi:10.1242/dmm.013854), 2013-11-07

**Fig. S1.** The tissue models support monocyte differentiation. (A) Bright field images of sections of tissue models implanted with freshly prepared peripheral blood monocytes stained with HA (blue) and anti-CD68 (brown) (D7). (B) Confocal images of sections of uninfected tissue models implanted with PKH26-labeled monocytes (red) and stained post-fixation with anti-CD68 (green). Sections stained without primary antibodies (Abs) were used as controls in (A) and (B). Scale bars are 50 $\mu$ m.

# Supplementary Fig. S1

**A** Mono (No primary Ab)

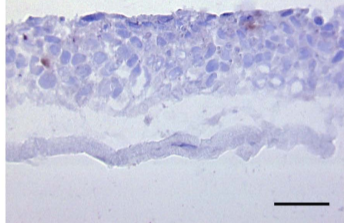

**Mono (CD68)**

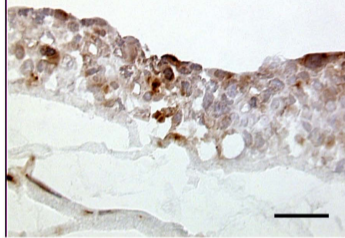

**B** Mono

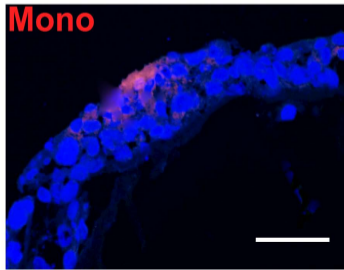

**Mono / MΦ**

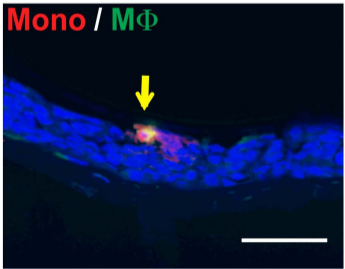

**Fig. S2.** Quantification of monocyte (Mono)/macrophages (M $\Phi$ ) clustering at the site of Mtb infection. DAPI (blue)-stained sections of infected tissue models implanted with PKH26-labeled monocytes (red) and GFP-expressing mycobacteria (green) were analyzed by confocal microscopy. Regions of interest with bacteria (ROI<sub>bact</sub>) were selected in the green channel (B) and the Mean Fluorescence Intensity (MFI) was measured in this region in the red channel (MFI<sub>bact</sub>, (C); PKH26-expressing monocytes/macrophages). The same ROI was moved to a place without infection (ROI<sub>con</sub>) and the MFI in the red channel was measured (MFI<sub>con</sub>, D). Results are presented either as the absolute values of the MFIs or as ratios of the individual MFI<sub>bact</sub>/MFI<sub>con</sub> pairs. Scale bars are 50  $\mu$ m.

# Supplementary Fig. S2

**A** Mono-M $\Phi$ / H37Rv/ 3-channels

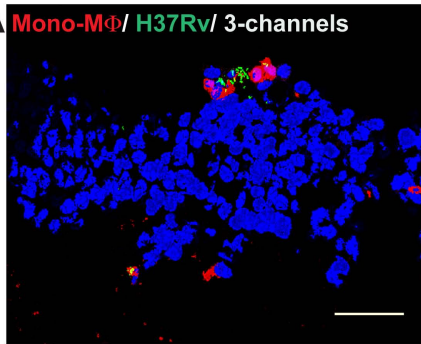

**B** Mono-M $\Phi$ / H37Rv/ 2-channels

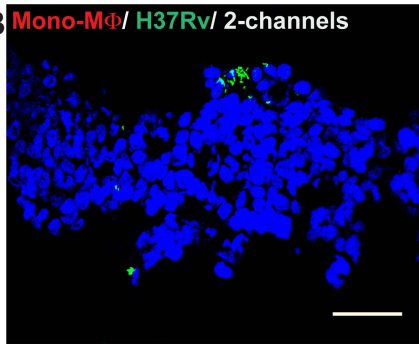

**C** Mono-M $\Phi$ / H37Rv/ ROI<sub>bact</sub>

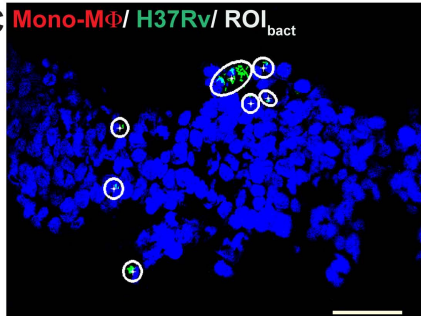

**D** Mono-M $\Phi$ / H37Rv/ ROI<sub>con</sub>

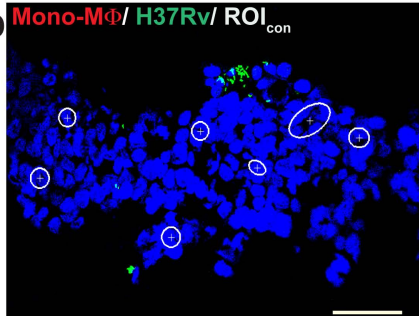

**Fig. S3.** The human in vitro lung tissue model for TB infection. The tissue model involves addition of immune cells and human bronchial epithelial cells onto the human lung fibroblasts embedded in a collagen matrix created on a transwell membrane. Mtb (green)-infected macrophages (yellow) are used as vehicles to introduce the infection into the tissue. Pre-labeled monocytes (red) are added to visualize recruitment of this cell type to the site of infection. The tissue models are air-lifted to ensure stratification of the epithelia and mucus secretion. The model developed by this method enables the investigation of early TB granuloma formation.

Supplementary Fig. S3

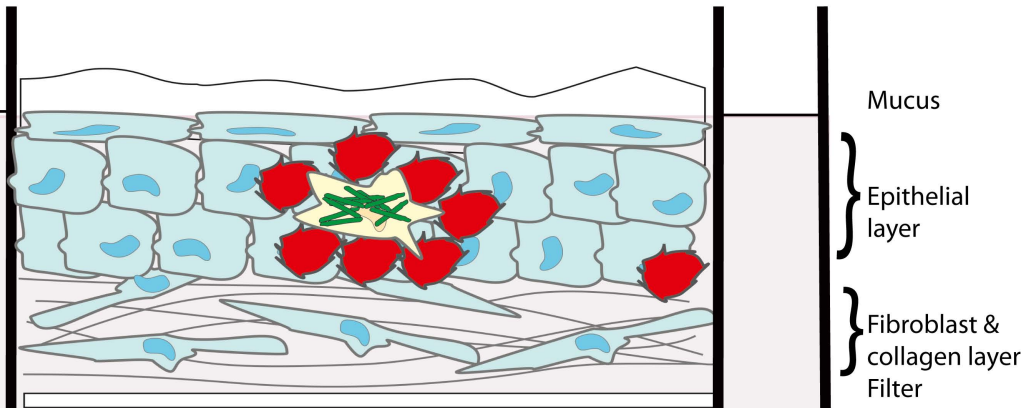

Supplement: supp_7.2.281_DMM013854.pdf [file supp_7.2.281_DMM013854.pdf]
